# Supplementary material for: Ultrasonication-driven downscaling and formation of Lewis acid–base sites in hydrogen-bonded Co metal–organic frameworks trigger exceptional catalytic performance for the Knoevenagel condensation reaction
Source: Royal Society of Chemistry journal article supplement (doi:10.1039/d4tc01957a), 2024-01-01
Supplement: d4tc01957a1.pdf [file d4tc01957a1.pdf]

# **Ultrasonication-Driven Downscaling and Formation of Lewis Acid–Base Sites in Hydrogen-Bonded Co Metal-Organic Framework Trigger Exceptional Catalytic Performance for Knoevenagel Condensation Reaction**

Zhida Liu<sup>a,b,c</sup>, Yan Zhou<sup>c</sup>, Zheng Chen<sup>c</sup>, Meng Zheng<sup>b</sup>, Wenxiao Chen<sup>b</sup>, Haiqing Ma<sup>b</sup>, Xiaoyu Chen<sup>b,\*</sup>,  
Jin Wang<sup>b,c,\*</sup>

<sup>a</sup> State Key Laboratory of Biobased Fiber Manufacturing Technology, Tianjin University of Science and Technology, Tianjin, 300457, China

<sup>b</sup> College of Materials Science and Engineering, Shenzhen University, Shenzhen 518071, China

<sup>c</sup> School of Chemistry and Materials Sciences, University of Science and Technology of China, Hefei, Anhui 230026, China

\* Corresponding authors: Xiaoyu Chen: [chxysh@126.com](mailto:chxysh@126.com)

Jin Wang: [wangjin19@szu.edu.cn](mailto:wangjin19@szu.edu.cn), [wangjinchem@ahnu.edu.cn](mailto:wangjinchem@ahnu.edu.cn)

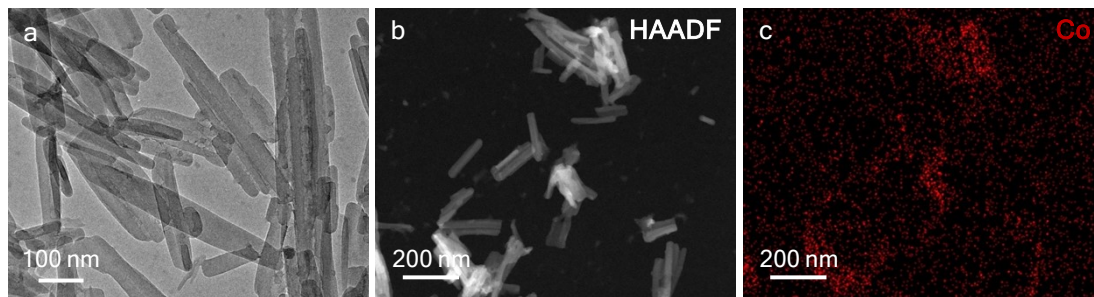

Figure S1. The TEM image of CoMOF-NR(a). TEM-mapping of CoMOF-NR. HRTEM dark field image (b) and Co element (c).

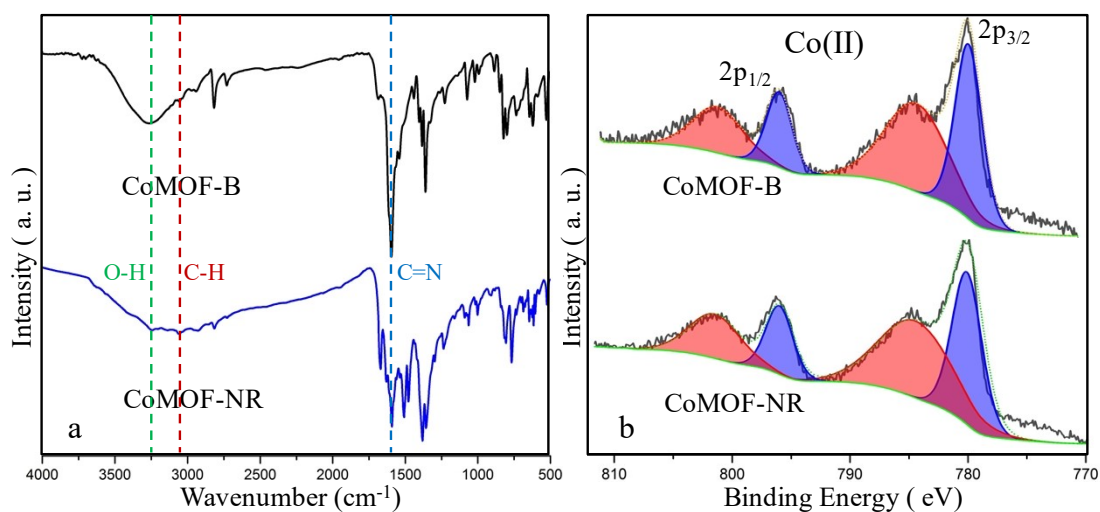

Figure S2. Infrared spectra of CoMOF-B (black) and CoMOF-NR (blue) (a). XPS for Co  $2p_{3/2}$  and  $2p_{1/2}$  of CoMOF-B and CoMOF-NR (b).

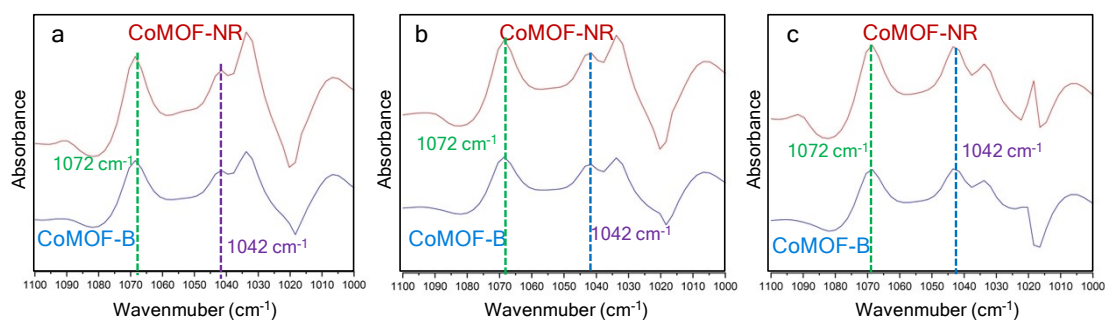

Figure S3. Py-FTIR spectra of CoMOF-B and CoMOF-NR at 25 °C (a), 80 °C (b) and 120 °C (c).

Table S1. Element content comparison of CoMOF-B and CoMOF-NR. (C, N, and H content were determined by Organic Elemental Analyzer (EA) and Co content were determined by ICP-OES. )

| Elements/Samples | CoMOF-B(%) | CoMOF-NR(%) | Theoretical (%) |
|------------------|------------|-------------|-----------------|
| C                | 53.20      | 53.52       | 53.30           |
| N                | 11.01      | 11.32       | 11.31           |
| H                | 4.39       | 3.86        | 4.04            |
| O                | 21.23      | 18.92       | 19.38           |
| Co               | 11.65      | 12.18       | 11.91           |

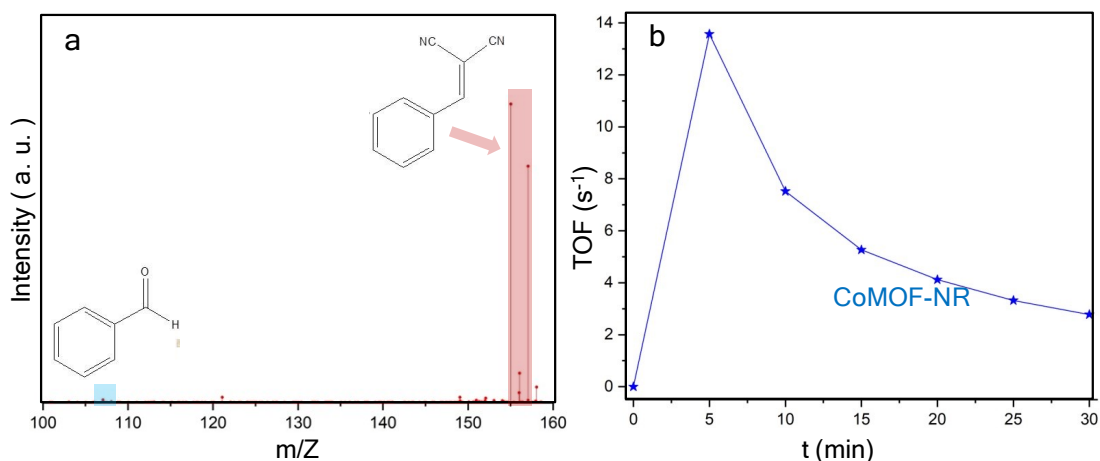

Figure S4. Mass spectrum of the reaction solution after 30 min (reaction condition: benzaldehyde 2 mmol, malononitrile 2.2 mmol, CoMOF-NR 2mol%, room temperature, ethanol 10mL) (a). The TOF (s<sup>-1</sup>) of CoMOF-NR in Knoevenagel Condensation Reaction of benzaldehyde at different reaction time(b).

Table S2. Comparison of different catalytic performance of Knoevenagel Condensation Reaction of benzaldehyde.

| Entry | Catalyst                                                                                                                                                                                                         | Time(min) | T(°C) | Solvent  | Yield(%) | TOF(s <sup>-1</sup> ) | Ref.      |
|-------|------------------------------------------------------------------------------------------------------------------------------------------------------------------------------------------------------------------|-----------|-------|----------|----------|-----------------------|-----------|
| 1     | PSM of [Co(pytpy)(AIP)·H <sub>2</sub> O] <sub>n</sub>                                                                                                                                                            | 30        | 40    | methanol | 79.0     | 3.51                  | 1         |
| 2     | NUC-70a                                                                                                                                                                                                          | 150       | 55    | methanol | 100      | 0.27                  | 2         |
| 3     | NUC-65Br                                                                                                                                                                                                         | 720       | rt    | ethanol  | 99       | 0.55                  | 3         |
| 4     | NUC-62                                                                                                                                                                                                           | 240       | 63    | methanol | 97       | 2.02                  | 4         |
| 5     | C <sub>26</sub> H <sub>30</sub> N <sub>2</sub> O <sub>17</sub> Mn <sub>2</sub>                                                                                                                                   | 80        | 25    | ethanol  | >99      | 1.67                  | 5         |
| 6     | H <sub>21</sub> K <sub>9</sub> {[Cu(en) <sub>2</sub> ] <sub>9</sub> (H <sub>2</sub> O) <sub>8</sub> }[Cd <sub>3</sub> O <sub>6</sub> (SiN<br>b <sub>18</sub> O <sub>54</sub> ) <sub>3</sub> ]·58H <sub>2</sub> O | 120       | 60    | ethanol  | 99       | 5.50                  | 6         |
| 7     | UiO-66-NH <sub>2</sub>                                                                                                                                                                                           | 60        | 25    | DMF      | 70.8     | /                     | 7         |
| 8     | Mg <sub>1</sub> /NC                                                                                                                                                                                              | 120       | 80    | toluene  | <96      | 0.01                  | 8         |
| 9     | NiXero                                                                                                                                                                                                           | 240       | 27    | water    | 97       | 0.28                  | 9         |
| 10    | Zn <sub>3</sub> Sb <sub>4</sub> O <sub>6</sub> F <sub>6</sub>                                                                                                                                                    | 300       | 60    | /        | 99       | /                     | 10        |
| 11    | CoMOF-NR                                                                                                                                                                                                         | 5         | rt    | ethanol  | 81.4     | 13.57                 | This work |
| 12    | CoMOF-NR                                                                                                                                                                                                         | 30        | rt    | ethanol  | >99      | 2.78                  | This work |

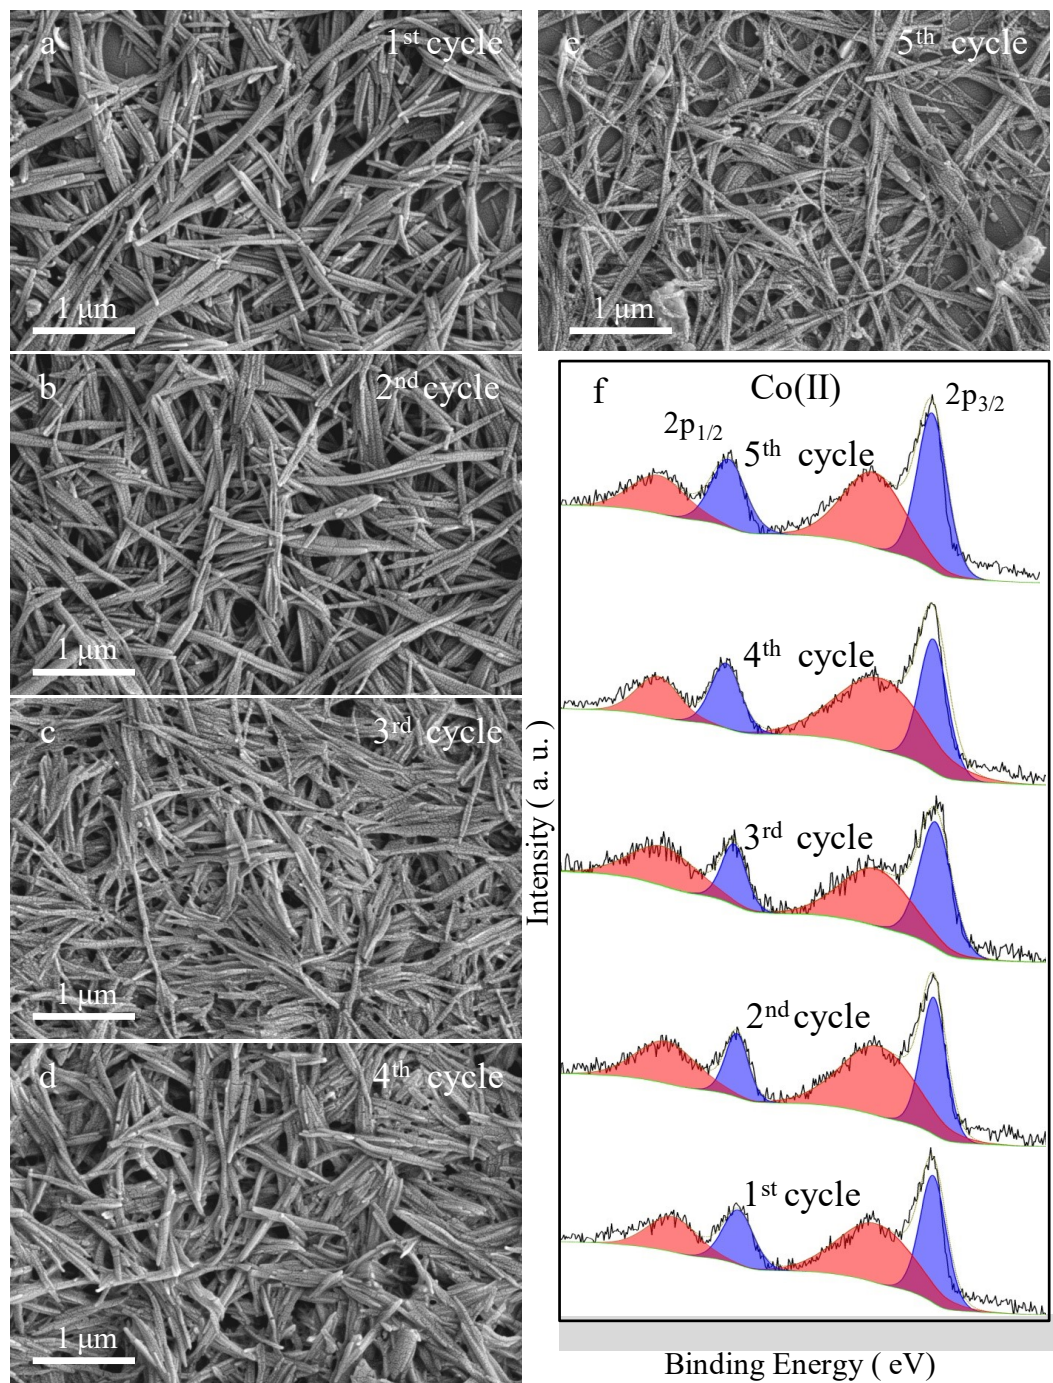

Figure S5. SEM images of CoMOF-NR after Knoevenagel Condensation Reaction for 1 cycle (a), 2 cycles (b), 3 cycles (c), 4 cycles (d) and 5 cycles (e). XPS for Co 2p<sub>3/2</sub> and 2p<sub>1/2</sub> of CoMOF-NR after Knoevenagel Condensation Reaction (f).

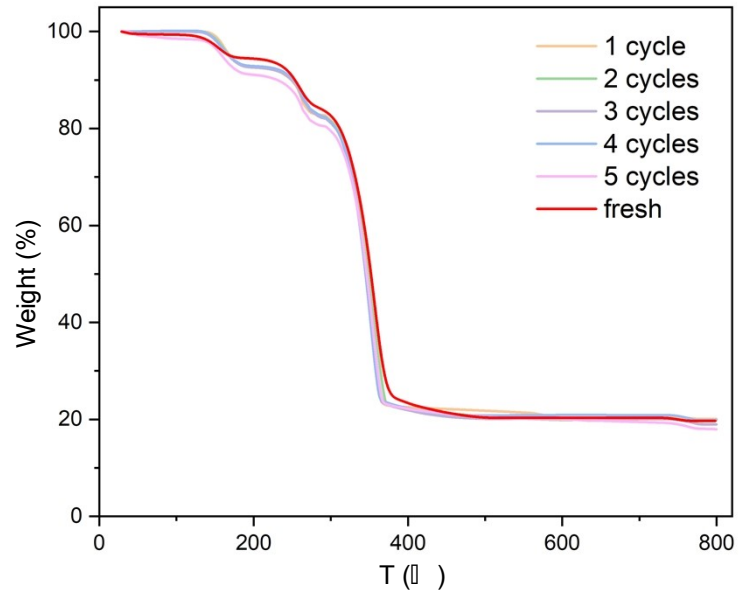

Figure S6. TGA curves of CoMOF-NR before and after Knoevenagel Condensation Reaction.

## References for supporting information

1. Z. Liu, L. Ning, K. Wang, L. Feng, W. Gu, X. Liu, A new imidazole-functionalized 3D-cobalt metal-organic framework as a high efficiency heterogeneous catalyst for Knoevenagel condensation reaction of furfural, *Journal of Molecular Structure*, 1221, (2020), 128744.
2. H. Lv, L. Fan, C. Jiao, X. Zhang, Heterometallic YbCo–Organic Framework for Efficiently Catalyzing Cycloaddition of CO<sub>2</sub> with Epoxides and Knoevenagel Condensation, *Cryst. Growth Des.*, 2023, 23, 2882–2892.
3. S. Liu, H. Chen, L. Fan, X. Zhang, Highly Robust {In<sub>2</sub>}–Organic Framework for Efficiently Catalyzing CO<sub>2</sub> Cycloaddition and Knoevenagel Condensation, *Inorg. Chem.*, 2023, 62, 3562–3572.
4. Z. Zhang, H. Lv, K. Yang, X. Zhang,  $\theta$ -[Mo<sub>8</sub>O<sub>26</sub>]<sup>4+</sup>-based multifunctional hybrid material for high catalytic performance on the cycloaddition of CO<sub>2</sub>, esterification and Knoevenagel condensation, *Dalton Trans.*, 2023, 52, 7119–7128.
5. Z. Xu, Y. Zhao, L. Chen, C. Zhu, P. Li, W. Gao, J. Li, X. Zhang, Thermally activated bipyridyl-based Mn-MOFs with Lewis acid–base bifunctional sites for highly efficient catalytic cycloaddition of CO<sub>2</sub> with epoxides and Knoevenagel condensation reactions, *Dalton Trans.*, 2023, 52, 3671–3681.
6. Z. Liu, J. Ye, Y. Li, Y. Sun, X. Li, C. Sun, S. Zheng, Cadmium-containing windmill-like heteropolyoxoniobate macrocycle with high yield for catalyzing Knoevenagel condensation, *Dalton Trans.*, 2023, 52, 1193–1197.
7. H. Wen, W. Zhang, Z. Diao, W. Liu, G. Liu, C. Gu, T. Yang, H. Qi, L. Sun, Azobenzene-Functionalized UiO-66-NH<sub>2</sub>: Solid Base Catalysts with Photocontrollable Activity, *Inorg. Chem.* 2023, 62, 8655–8662.
8. S. Peng, G. Zhang, X. Shao, X. Song, S. Qi, P. Tan, X. Liu, J. Yan, L. Sun, Stable Mg Single-Atom Solid Base Catalysts Anchored on Metal–Organic Framework-Derived Nitrogen-Doped Carbon, *Inorg. Chem.*, 2024, 63, 1607–1612.
9. E. Saha, H. Jungi, S. Dabas, A. Mathew, R. Kuniyil, S. Subramanian, J. Mitra, Amine-rich Nickel(II)-Xerogel as a Highly Active Bifunctional Metallo-organo Catalyst for Aqueous Knoevenagel Condensation and Solvent-free CO<sub>2</sub> Cycloaddition, *Inorg. Chem.* 2023, 62, 14959–14970.
10. S. Paul, B. Sen, N. Basak, N. Chakraborty, K. Bhakat, S. Das, E. Islam, S. Mondal, S. J. Abbas, S. I. Ali, Zn<sub>3</sub>Sb<sub>4</sub>O<sub>6</sub>F<sub>6</sub> and KI-Doped Zn<sub>3</sub>Sb<sub>4</sub>O<sub>6</sub>F<sub>6</sub>: A Metal Oxyfluoride System for Photocatalytic Activity, Knoevenagel Condensation, and Bacterial Disinfection, *Inorg. Chem.* 2023, 62, 1032–1046.
